# Supplementary material for: Cell permeable fluorescent receptor for detection of H2PO4− in aqueous solvent
Source: Royal Society of Chemistry journal article supplement (doi:10.1039/c2ob27201f), 2012-12-20
Supplement: c2ob27201f.pdf [file c2ob27201f.pdf]

## Supporting Information

For

### Cell permeable fluorescent receptor for detection of $\text{H}_2\text{PO}_4^-$ in aqueous solvent

Supriti Sen, Kuheli Chakrabarty,<sup>2</sup> Ipsit Hauli,<sup>3</sup> Subhra Kanti Mukhopadhyay<sup>3</sup> and Pabitra Chattopadhyay\*<sup>1</sup>

<sup>1</sup>Department of Chemistry, The University of Burdwan, Golapbag, Burdwan -713104, India,

<sup>2</sup>Department of Chemistry, Visva- Bharati, Santiniketan, WB, India

<sup>3</sup>Department of Microbiology, The University of Burdwan, Golapbag, Burdwan -713104, India

| Contents                                            | Page No. |
|-----------------------------------------------------|----------|
| Figure S1. $^1\text{H}$ NMR spectrum of <b>1</b>    | 2        |
| Figure S2. Mass spectrum of <b>1</b>                | 3        |
| Figure S3. $^{13}\text{C}$ NMR spectrum of <b>1</b> | 4        |
| Figure S4. Mass spectrum of <b>2</b>                | 5        |
| Figure S5. IR spectra of <b>1</b> and <b>2</b>      | 6        |

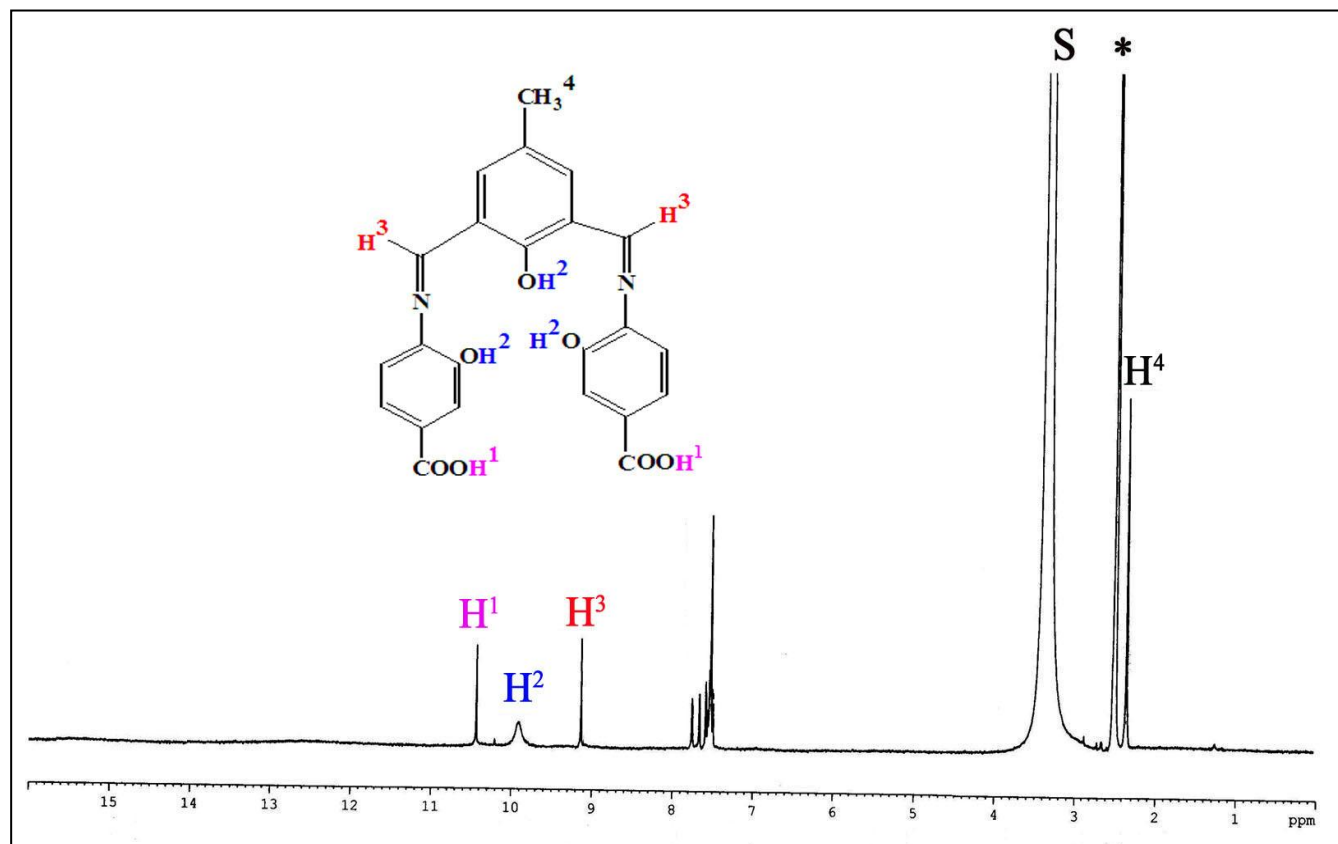

**Figure S1.** <sup>1</sup>H NMR spectrum of **1** (DMSO-*d*<sub>6</sub>, 400 MHz). The signal marked with \* and S are for H<sub>2</sub>O and solvent peak(DMSO-*d*<sub>6</sub>), respectively.

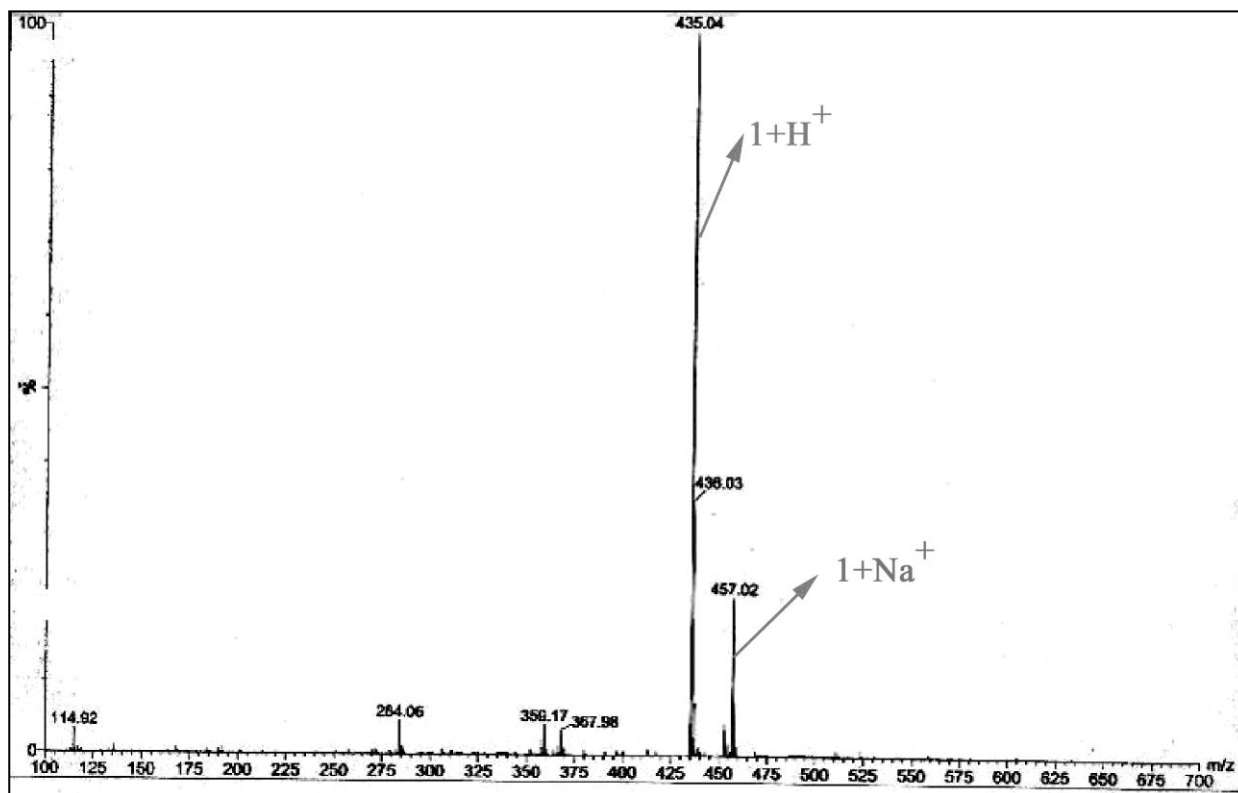

Figure S2. Mass spectrum of 1.

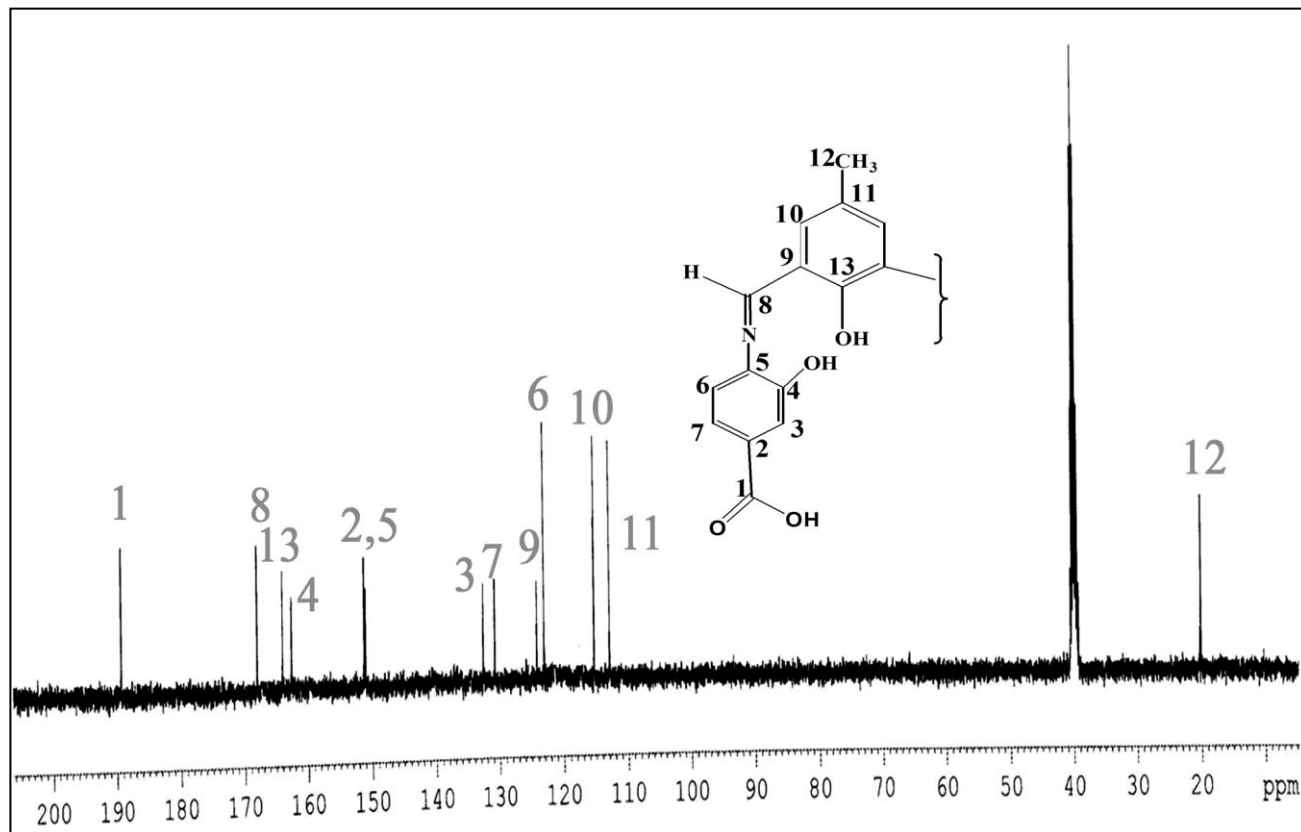

**Figure S3.**  $^{13}\text{C}$ NMR spectrum of **1** ( $\text{DMSO-}d_6$ , 400 MHz)

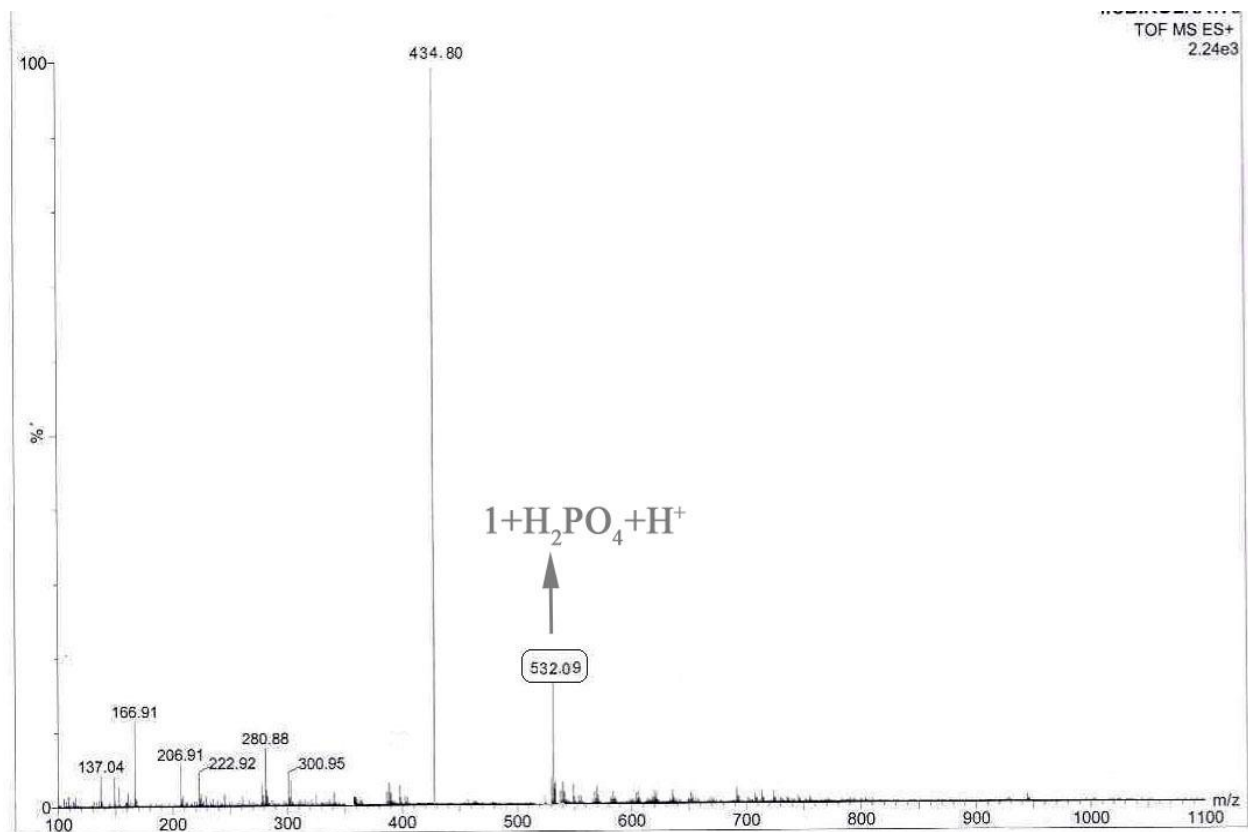

**Figure S4.** Mass spectrum of **2**.

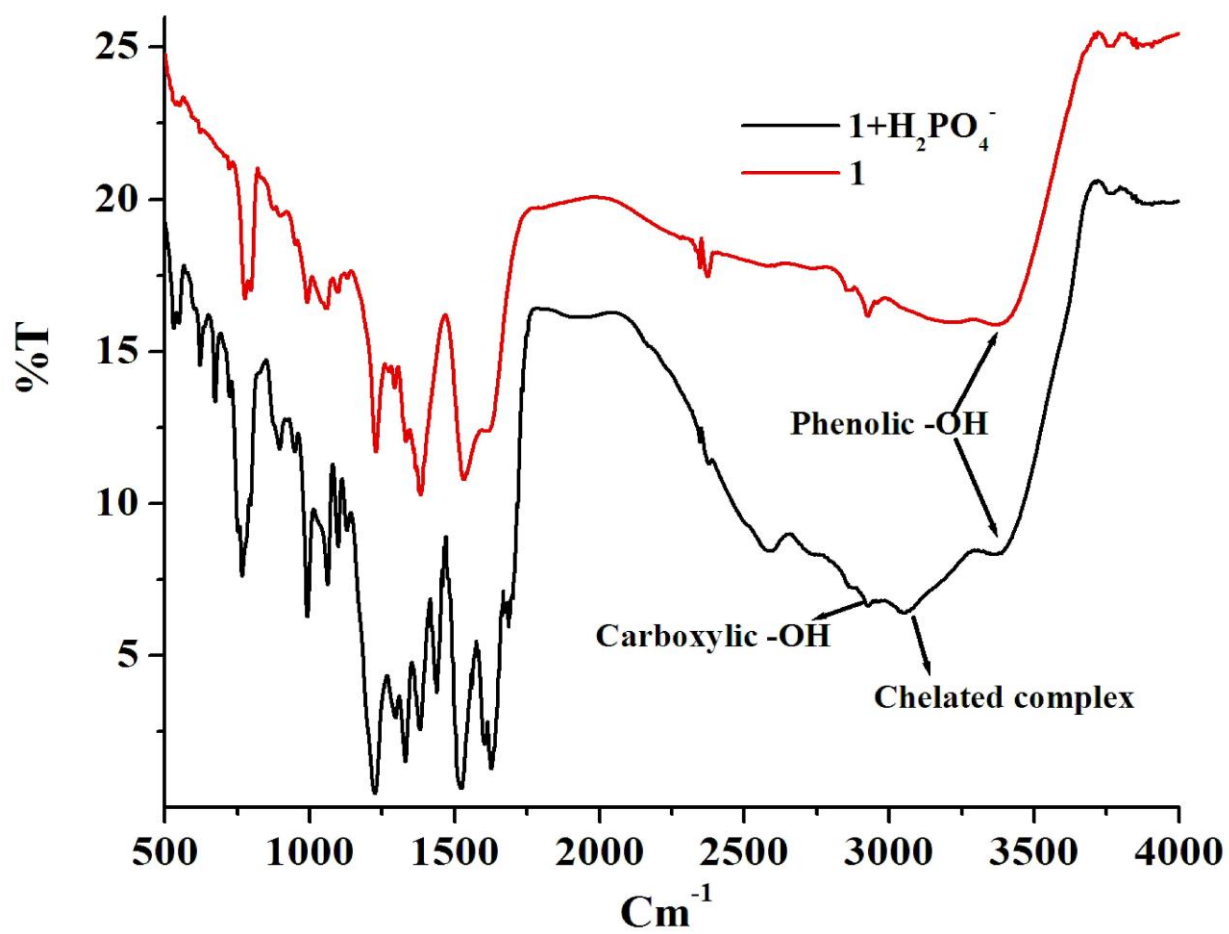

**Figure S5.** IR spectra of **1** and **2** (**1**+H<sub>2</sub>PO<sub>4</sub>).
